# Supplementary material for: Increase in dicentric chromosome formation after a single CT scan in adults
Source: PubMed Central journal article supplement (PMC4563376; doi:10.1038/srep13882), 2015-09-09
Supplement: srep13882-s1.pdf [file srep13882-s1.pdf]

*[Supplementary Information]*

**Increase in dicentric chromosome formation after a single CT scan in adults**

Yu Abe<sup>1</sup>, Tomisato Miura<sup>2</sup>, Mitsuaki A Yoshida<sup>3</sup>, Risa Ujiie<sup>1</sup>, Yumiko Kurosu<sup>1</sup>, Nagisa Kato<sup>1</sup>, Atsushi Katafuchi<sup>1</sup>, Naohiro Tsuyama<sup>1</sup>, Takashi Ohba<sup>4</sup>, Tomoko Inamasu<sup>4</sup>, Fumio Shishido<sup>5</sup>, Hideyoshi Noji<sup>6</sup>, Kazuei Ogawa<sup>6</sup>, Hiroshi Yokouchi<sup>7</sup>, Kenya Kanazawa<sup>7</sup>, Takashi Ishida<sup>7</sup>, Satoshi Muto<sup>8</sup>, Jun Ohsugi<sup>8</sup>, Hiroyuki Suzuki<sup>8</sup>, Tetsuo Ishikawa<sup>9, 11</sup>, Kenji Kamiya<sup>10, 11</sup>, Akira Sakai<sup>1, 11\*</sup>

<sup>1</sup>Dept. of Radiation Life Sciences, Fukushima Medical University School of Medicine, Fukushima, Japan

<sup>2</sup>Dept. of Pathologic Analysis, Hirosaki University Graduate School of Health Sciences, Hirosaki, Japan

<sup>3</sup>Dept. of Radiation Biology, Institute of Radiation Emergency Medicine, Hirosaki University, Hirosaki, Japan

<sup>4</sup>Dept. of Radiation Health Management, Fukushima Medical University School of Medicine, Fukushima, Japan

<sup>5</sup>Dept. of Radiology, Fukushima Medical University School of Medicine, Fukushima, Japan

<sup>6</sup>Dept. of Cardiology & Hematology, Fukushima Medical University School of Medicine, Fukushima, Japan

<sup>7</sup>Dept. of Pulmonary Medicine, Fukushima Medical University School of Medicine, Fukushima, Japan

<sup>8</sup>Dept. of Regenerative Surgery, Fukushima Medical University School of Medicine, Fukushima, Japan

<sup>9</sup>Dept. of Radiation Physics and Chemistry, Fukushima Medical University School of Medicine, Fukushima, Japan

<sup>10</sup>Dept. of Experimental Oncology, Research Institute for Radiation Biology and Medicine, Hiroshima University, Hiroshima, Japan

<sup>11</sup>Radiation Medical Science Center for the Fukushima Health Management Survey, Fukushima Medical University School of Medicine, Fukushima, Japan

\*Correspondence:

Akira Sakai, M.D., Ph.D.

Dept. of Radiation Life Sciences

Fukushima Medical University School of Medicine

1 Hikarigaoka, Fukushima, 960-1295 Japan

TEL: +81-24-547-1703

FAX: +81-24-547-1704

E-mail: sakira@fmu.ac.jp

Table S1a. Analysis of DIC formation before and after the CT scan (Giemsa staining, 2,000 metaphases)

| Patient No. | Timing    | Number of cells scored | Number of DICs formed | Number of cells with aberrations <sup>#</sup> | DICs/cell | Increment of DIC formation | DIC distribution |    |   |   |              |               |
|-------------|-----------|------------------------|-----------------------|-----------------------------------------------|-----------|----------------------------|------------------|----|---|---|--------------|---------------|
|             |           |                        |                       |                                               |           |                            | 0                | 1  | 2 | 3 | 4            | ≥5            |
| 1           | Before CT | 2000                   | 5                     | 20                                            | 0.003     | 3 / 2000                   | 1995             | 5  | 0 | 0 | 0            | 0             |
|             | After CT  | 2000                   | 8                     | 20                                            | 0.004     |                            | 1993             | 6  | 1 | 0 | 0            | 0             |
| 2           | Before CT | 2000                   | 5                     | 27                                            | 0.003     | 4 / 2000                   | 1995             | 5  | 0 | 0 | 0            | 0             |
|             | After CT  | 2000                   | 9                     | 25                                            | 0.005     |                            | 1991             | 9  | 0 | 0 | 1 rogue cell | 0             |
| 3           | Before CT | 2000                   | 9                     | 38                                            | 0.005     | 3 / 2000                   | 1991             | 9  | 0 | 0 | 0            | 2 rogue cells |
|             | After CT  | 2000                   | 12                    | 22                                            | 0.006     |                            | 1989             | 10 | 1 | 0 | 1 rogue cell | 0             |
| 4           | Before CT | 2000                   | 5                     | 17                                            | 0.003     | 2 / 2000                   | 1995             | 5  | 0 | 0 | 0            | 0             |
|             | After CT  | 2000                   | 7                     | 18                                            | 0.004     |                            | 1993             | 7  | 0 | 0 | 0            | 0             |
| 5           | Before CT | 2000                   | 0                     | 6                                             | 0.000     | 4 / 2000                   | 2000             | 0  | 0 | 0 | 0            | 0             |
|             | After CT  | 2000                   | 4                     | 24                                            | 0.002     |                            | 1996             | 4  | 0 | 0 | 0            | 0             |
| 6           | Before CT | 2000                   | 3                     | 17                                            | 0.002     | 7 / 2000                   | 1997             | 3  | 0 | 0 | 0            | 0             |
|             | After CT  | 2000                   | 10                    | 32                                            | 0.005     |                            | 1990             | 10 | 0 | 0 | 0            | 0             |
| 7           | Before CT | 2000                   | 15                    | 37                                            | 0.008     | 2 / 2000                   | 1985             | 15 | 0 | 0 | 1 rogue cell | 0             |
|             | After CT  | 2000                   | 17                    | 51                                            | 0.009     |                            | 1983             | 17 | 0 | 0 | 0            | 0             |
| 8           | Before CT | 2000                   | 12                    | 56                                            | 0.006     | 2 / 2000                   | 1988             | 12 | 0 | 0 | 0            | 0             |
|             | After CT  | 2000                   | 14                    | 56                                            | 0.007     |                            | 1986             | 14 | 0 | 0 | 0            | 0             |
| 9           | Before CT | 2000                   | 4                     | 23                                            | 0.002     | 6 / 2000                   | 1997             | 2  | 1 | 0 | 0            | 0             |
|             | After CT  | 2000                   | 10                    | 29                                            | 0.005     |                            | 1990             | 10 | 0 | 0 | 0            | 0             |
| 10          | Before CT | 2000                   | 1                     | 7                                             | 0.001     | 0 / 2000                   | 1999             | 1  | 0 | 0 | 0            | 0             |
|             | After CT  | 2000                   | 1                     | 7                                             | 0.001     |                            | 1999             | 1  | 0 | 0 | 0            | 0             |

<sup>#</sup> Chromosomal aberrations including dicentric, trisomic, centric ring, acentric ring, minute, and marker chromosome and fragment

Table S1b. Analysis of DIC formation before and after the CT scan (Centromere-FISH, 2,000 metaphases)

| Patient No. | Timing    | Number of cells scored | Number of DICs formed | Number of cells with aberrations <sup>#</sup> | DICs/cell | Increment of DIC formation | DIC distribution |    |   |   |   |    |
|-------------|-----------|------------------------|-----------------------|-----------------------------------------------|-----------|----------------------------|------------------|----|---|---|---|----|
|             |           |                        |                       |                                               |           |                            | 0                | 1  | 2 | 3 | 4 | ≥5 |
| 1           | Before CT | 2000                   | 2                     | 15                                            | 0.001     | 3 / 2000                   | 1998             | 2  | 0 | 0 | 0 | 0  |
|             | After CT  | 2000                   | 5                     | 27                                            | 0.003     |                            | 1995             | 5  | 0 | 0 | 0 | 0  |
| 2           | Before CT | 2000                   | 3                     | 14                                            | 0.002     | 2 / 2000                   | 1997             | 3  | 0 | 0 | 0 | 0  |
|             | After CT  | 2000                   | 5                     | 16                                            | 0.003     |                            | 1995             | 5  | 0 | 0 | 0 | 0  |
| 3           | Before CT | 2000                   | 5                     | 24                                            | 0.003     | 4 / 2000                   | 1995             | 5  | 0 | 0 | 0 | 0  |
|             | After CT  | 2000                   | 9                     | 36                                            | 0.005     |                            | 1991             | 9  | 0 | 0 | 0 | 0  |
| 4           | Before CT | 2000                   | 3                     | 32                                            | 0.002     | 1 / 2000                   | 1997             | 3  | 0 | 0 | 0 | 0  |
|             | After CT  | 2000                   | 4                     | 20                                            | 0.002     |                            | 1996             | 4  | 0 | 0 | 0 | 0  |
| 5           | Before CT | 2000                   | 3                     | 26                                            | 0.002     | 3 / 2000                   | 1997             | 3  | 0 | 0 | 0 | 0  |
|             | After CT  | 2000                   | 6                     | 24                                            | 0.003     |                            | 1994             | 6  | 0 | 0 | 0 | 0  |
| 6           | Before CT | 2000                   | 2                     | 10                                            | 0.001     | 6 / 2000                   | 1998             | 2  | 0 | 0 | 0 | 0  |
|             | After CT  | 2000                   | 8                     | 26                                            | 0.004     |                            | 1992             | 8  | 0 | 0 | 0 | 0  |
| 7           | Before CT | 2000                   | 11                    | 29                                            | 0.006     | 4 / 2000                   | 1989             | 11 | 0 | 0 | 0 | 0  |
|             | After CT  | 2000                   | 15                    | 42                                            | 0.008     |                            | 1985             | 15 | 0 | 0 | 0 | 0  |
| 8           | Before CT | 2000                   | 13                    | 51                                            | 0.007     | 1 / 2000                   | 1987             | 13 | 0 | 0 | 0 | 0  |
|             | After CT  | 2000                   | 14                    | 52                                            | 0.007     |                            | 1986             | 14 | 0 | 0 | 0 | 0  |
| 9           | Before CT | 2000                   | 2                     | 12                                            | 0.001     | 6 / 2000                   | 1998             | 2  | 0 | 0 | 0 | 0  |
|             | After CT  | 2000                   | 8                     | 25                                            | 0.004     |                            | 1992             | 8  | 0 | 0 | 0 | 0  |
| 10          | Before CT | 2000                   | 0                     | 4                                             | 0.000     | 1 / 2000                   | 2000             | 0  | 0 | 0 | 0 | 0  |
|             | After CT  | 2000                   | 1                     | 7                                             | 0.001     |                            | 1999             | 1  | 0 | 0 | 0 | 0  |

<sup>#</sup> Chromosomal aberrations including dicentric, trisomic, centric ring, acentric ring, minute, and marker chromosome and fragment

Table S2a. Analysis of DIC formation (Giemsa staining, 1,000 metaphases)

| Patient No. | DICs formed/metaphase |          | Increment<br>of DIC formation |
|-------------|-----------------------|----------|-------------------------------|
|             | Before CT             | After CT |                               |
| 1           | 3                     | 5        | 2/1000                        |
| 2           | 5                     | 5        | 0/1000                        |
| 3           | 7                     | 11       | 4/1000                        |
| 4           | 4                     | 4        | 0/1000                        |
| 5           | 0                     | 2        | 2/1000                        |
| 6           | 2                     | 4        | 2/1000                        |
| 7           | 9                     | 11       | 2/1000                        |
| 8           | 5                     | 9        | 4/1000                        |
| 9           | 2                     | 5        | 3/1000                        |
| 10          | 1                     | 0        | -1/1000                       |

Table S2b. Analysis of DIC formation (Centromere-FISH, 1,000 metaphases)

| Patient No. | DICs formed/metaphase |          | Increment<br>of DIC formation |
|-------------|-----------------------|----------|-------------------------------|
|             | Before CT             | After CT |                               |
| 1           | 2                     | 2        | 0/1000                        |
| 2           | 1                     | 2        | 1/1000                        |
| 3           | 2                     | 5        | 3/1000                        |
| 4           | 2                     | 2        | 0/1000                        |
| 5           | 2                     | 2        | 0/1000                        |
| 6           | 1                     | 5        | 4/1000                        |
| 7           | 5                     | 7        | 2/1000                        |
| 8           | 7                     | 8        | 1/1000                        |
| 9           | 1                     | 4        | 3/1000                        |
| 10          | 0                     | 1        | 1/1000                        |

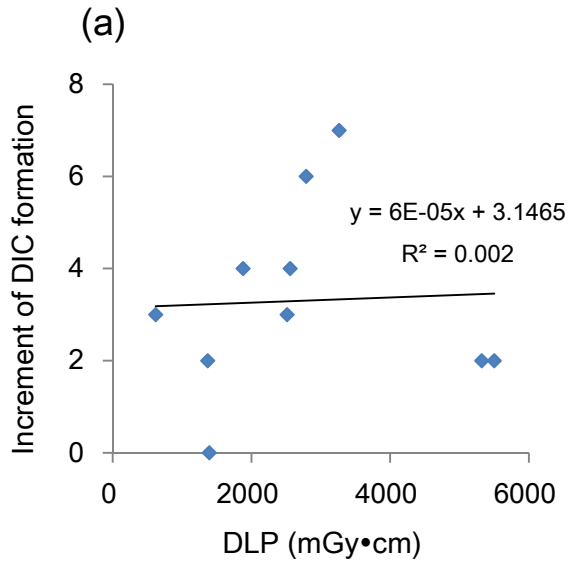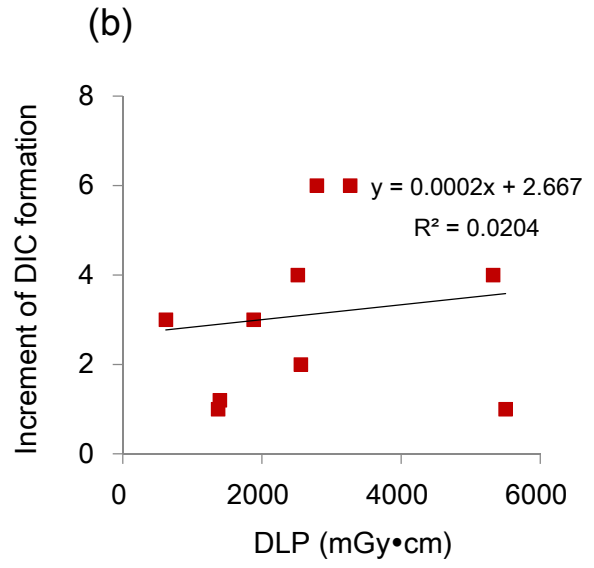

Figure S1.

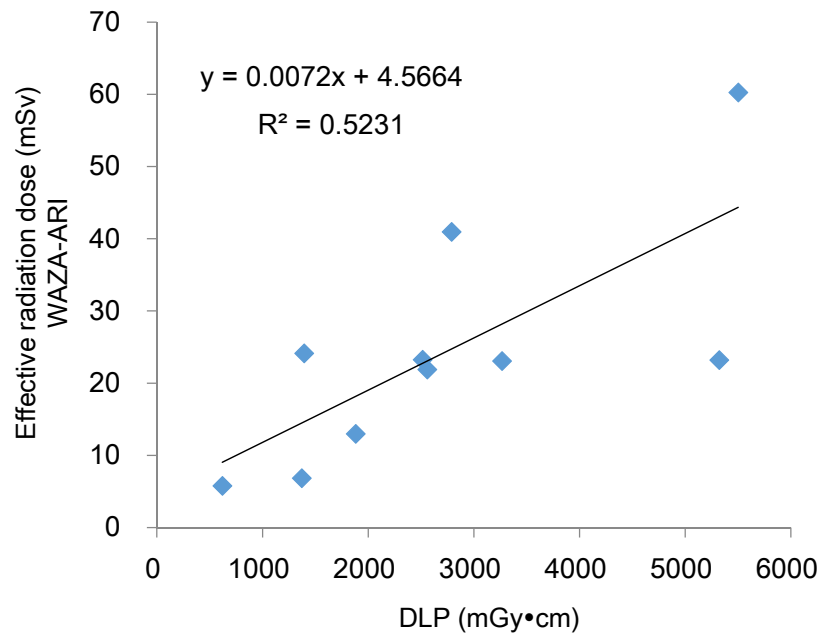

Figure S2.

## Supplementary Information

**Table S1a.** Analysis of DIC formation before and after the CT scan (Giemsa staining, 2,000 metaphases)

**Table S1b.** Analysis of DIC formation before and after the CT scan (Centromere-FISH, 2,000 metaphases)

**Table S2a.** Analysis of DIC formation (Giemsa staining, 1,000 metaphases)

**Table S2b.** Analysis of DIC formation (Centromere-FISH, 1,000 metaphases)

**Figure S1. Relationship between the increment of DIC formation and DLP in analysis of 2,000 metaphases using either Giemsa staining or Centromere-FISH.** No correlation was observed with the results of either Giemsa staining ( $R^2 = 0.00197$ ) (a) or Centromere-FISH ( $R^2 = 0.02036$ ) (b).

**Figure S2. Relationship between DLP and the effective radiation dose, as calculated using WAZA-ARI.** A correlation was observed between them ( $R^2 = 0.52312$ ).
